# Supplementary material for: Influence of the Number of Queens on Nest Establishment: Native and Invasive Ant Species
Source: PubMed Central journal article supplement (PMC7996303; doi:10.3390/ani11030591), 2021-02-24
Supplement: animals-11-00591-s001.pdf [file animals-11-00591-s001.pdf]

## Supplementary Material

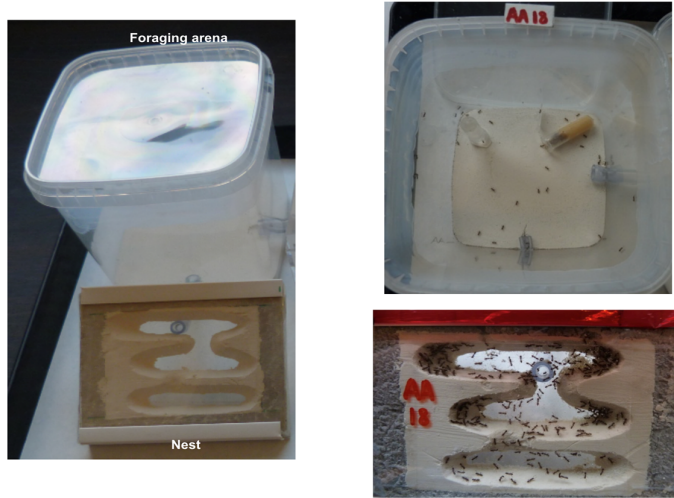

Figure SM1. Left photo shows a complete experimental set-up before placing the ants showing the foraging arena attached to the nest through a transparent tube. Right photo shows an example of photos taken after placing the ants with food and water supplies. The nest was covered with red transparent paper but lift only while taking the photo.

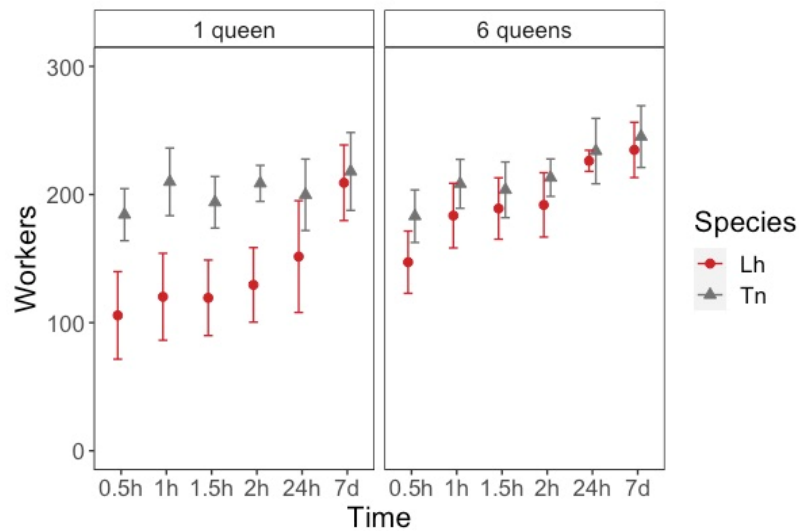

Figure SM2. Mean  $\pm$  95% CI number of workers inside the nest at different times after placing them in the foraging arena according to the species (Lh= *L. humile* and Tn = *T. nigerrimum*) and the number of queens in the colony.

| <b>Fixed effects</b> | <b>estimate</b> | <b>SE</b> | <b>z-value</b> | <b>p-value</b>   |
|----------------------|-----------------|-----------|----------------|------------------|
| Queens               | 0.398           | 0.100     | 4.113          | <b>&lt;0.001</b> |
| Species              | 0.544           | 0.100     | 5.550          | <b>&lt;0.001</b> |
| Time                 | 0.002           | 0.0003    | 5.861          | <b>&lt;0.001</b> |
| Queens x species     | -0.392          | 0.137     | -2.872         | <b>0.004</b>     |

Table SM1. Generalized linear mixed model (GLMM) results for the relationship between workers inside the nest and number of queens (1 or 6), species (Lh= *L. humile* and Tn = *T. nigerrimum*), and time (six records: 0.5h, 1h, 1.5h, 2h, 24h and 7d), as well as their interaction as fixed effects. We included nest ID as random effect. Bold values show p-values < 0.05

| Model                                                       | distribution  | df  | chat   | Chisq    | ratio  | p-value | AIC  |
|-------------------------------------------------------------|---------------|-----|--------|----------|--------|---------|------|
| Workers inside the nest (from 0.5 to 2h) (random intercept) | Poisson       | 306 | 3.542  | 1034.143 | 3.380  | <0.001  | 3667 |
|                                                             | Neg. binomial | 306 | 0.997  | 254.276  | 0.831  | 0.986   | 3280 |
| Workers inside the nest (24h and 7d) (random intercept)     | Poisson       | 64  | 2.016  | 122.196  | 1.909  | <0.001  | 792  |
|                                                             | Neg. binomial | 63  | 0.900  | 49.855   | 0.791  | 0.886   | 760  |
| Workers outside the nest (patrolling)                       | Poisson       | 35  | 6.159  | 218.530  | 6.070  | <0.001  | 361  |
|                                                             | Neg. binomial | 36  | 1.235  | 36.730   | 1.020  | 0.675   | 250  |
| Workers outside the nest (nest maintenance)                 | Poisson       | 36  | 12.948 | 489.080  | 13.860 | <0.001  | 676  |
|                                                             | Neg. binomial | 36  | 1.259  | 39.060   | 1.085  | 0.334   | 353  |
| Workers outside the nest (feeding)                          | Poisson       | 36  | 2.419  | 78.900   | 2.192  | <0.001  | 209  |
|                                                             | Neg. binomial | 36  | 1.364  | 39.770   | 1.104  | 0.306   | 201  |

Table SM2. Model parameters corresponding to model selection. In all cases, we keep models with negative binomial distribution.

|                                                          | coef       | exp (coef)  | se (coef) | z value   | Pr (> z )        |
|----------------------------------------------------------|------------|-------------|-----------|-----------|------------------|
| Queens                                                   | 1.073      | 2.923       | 0.265     | 4.042     | <b>&lt;0.001</b> |
| Species                                                  | 0.429      | 1.535       | 0.233     | 1.840     | 0.067            |
|                                                          | exp (coef) | exp (-coef) | lower .95 | upper .95 |                  |
| Queens                                                   | 2.923      | 0.342       | 1.738     | 4.916     |                  |
| Species                                                  | 1.535      | 0.651       | 0.972     | 2.423     |                  |
| Likelihood ratio test: 21.600 on 12 df, p < <b>0.001</b> |            |             |           |           |                  |

Table SM3. Results obtained from multivariate Cox model according to species (*T. nigerrimum* (Tn) and *L. humile* (Lh)) and number of Queens (1-queen and 6 queens). Significant value are presented in bold

|                                                 | coef       | exp (coef)  | se (coef) | z value   | Pr (> z ) |
|-------------------------------------------------|------------|-------------|-----------|-----------|-----------|
| Species                                         | 0.585      | 1.795       | 0.357     | 1.637     | 0.102     |
|                                                 | exp (coef) | exp (-coef) | lower .95 | upper .95 |           |
| Species                                         | 1.795      | 0.557       | 0.891     | 3.614     |           |
| Likelihood ratio test: 2.680 on 1 df, p = 0.100 |            |             |           |           |           |

Table SM4. Results obtained from univariate Cox model according to (*T. nigerrimum* (Tn) and *L. humile* (Lh)) for 1-queen nests. Significant value are presented in bold

|                                                 | coef       | exp (coef)  | se (coef) | z value   | Pr (> z ) |
|-------------------------------------------------|------------|-------------|-----------|-----------|-----------|
| Species                                         | 0.337      | 1.401       | 0.309     | 1.089     | 0.276     |
|                                                 | exp (coef) | exp (-coef) | lower .95 | upper .95 |           |
| Species                                         | 1.401      | 0.714       | 0.764     | 2.568     |           |
| Likelihood ratio test: 1.200 on 1 df, p = 0.300 |            |             |           |           |           |

Table SM5. Results obtained from univariate Cox model according to (*T. nigerrimum* (Tn) and *L. humile* (Lh)) for 6-queens. Significant value are presented in bold

| <b>Fixed effects</b> | <b>estimate</b> | <b>SE</b> | <b>z-value</b> | <b>p-value</b>   |
|----------------------|-----------------|-----------|----------------|------------------|
| Queens               | 0.488           | 0.115     | 4.248          | <b>&lt;0.001</b> |
| Species              | 0.633           | 0.116     | 5.441          | <b>&lt;0.001</b> |
| Time                 | 0.102           | 0.008     | 13.270         | <b>&lt;0.001</b> |
| Queens x species     | -0.470          | 0.162     | -2.898         | <b>0.004</b>     |

Table SM6. Generalized linear mixed model (GLMM) results for the relationship between workers inside the nest and number of queens (1 or 6), species (Lh= *L. humile* and Tn = *T. nigerrimum*), and time (four records: 0.5h, 1h, 1.5 and 2h), as well as their interaction as fixed effects. We included nest ID as random effect. Bold values show p-values < 0.05

| <b>contrast</b>            | <b>estimate</b> | <b>SE</b> | <b>z.ratio</b> | <b>p.value</b>   |
|----------------------------|-----------------|-----------|----------------|------------------|
| 1-queen Lh vs 6-queens Lh  | -0.488          | 0.116     | -4.206         | <b>&lt;0.001</b> |
| 1-queen Lh vs 1-queen Tn   | -0.636          | 0.117     | -5.417         | <b>&lt;0.001</b> |
| 1-queen Lh vs 6-queens Tn  | -0.654          | 0.116     | -5.635         | <b>&lt;.0001</b> |
| 6-queens Lh vs 1-queen Tn  | -0.148          | 0.116     | -1.281         | 0.575            |
| 6-queens Lh vs 6-queens Tn | -0.166          | 0.114     | -1.450         | 0.468            |
| 1-queen Tn vs 6-queens Tn  | -0.017          | 0.116     | -0.150         | 0.998            |

Table SM7. Pairwise comparison for significant interaction between number of queens and species combination from model for nest establishment. Bold values show p-values < 0.05

|                         | <b>estimate</b> | <b>SE</b> | <b>z-value</b> | <b>p-value</b>   |
|-------------------------|-----------------|-----------|----------------|------------------|
| Queens                  | 0.43027         | 0.08554   | 5.030          | <b>&lt;0.001</b> |
| Species                 | 0.29680         | 0.08803   | 3.372          | <b>&lt;0.001</b> |
| time                    | 0.36889         | 0.07723   | 4.776          | <b>&lt;0.001</b> |
| Queens x species        | -0.26928        | 0.11995   | -2.245         | <b>0.025</b>     |
| Queens x time           | -0.33512        | 0.09767   | -3.431         | <b>&lt;0.001</b> |
| Species x time          | -0.28191        | 0.10019   | -2.814         | <b>0.005</b>     |
| Queens x species x time | 0.29644         | 0.13098   | 2.263          | <b>0.024</b>     |

Table SM8. Generalized linear mixed model (GLMM) results for the relationship between workers inside the nest and the number of queens (1 or 6), species (Lh= *L. humile* and Tn = *T. nigerrimum*), and time (two records: 24 h and 7 days), as well as their interaction as fixed effects. We included nest ID as random effect. Bold values show p-values < 0.05

| <b>contrast</b>                    | <b>estimate</b> | <b>SE</b> | <b>z-value</b> | <b>p-value</b> |
|------------------------------------|-----------------|-----------|----------------|----------------|
| 1-queen Lh 24h vs 6-queens Lh 24h  | -0.43027        | 0.0855    | -5.030         | <.0001         |
| 1-queen Lh 24h vs 1-queen Tn 24h   | -0.29680        | 0.0880    | -3.372         | <b>0.0171</b>  |
| 1-queen Lh 24h vs 6-queens Tn 24h  | -0.45779        | 0.0854    | -5.358         | <.0001         |
| 1-queen Lh 24h vs 1-queen Lh 7d    | -0.36889        | 0.0772    | -4.776         | <.0001         |
| 1-queen Lh 24h vs 6-queens Lh 7d   | -0.46404        | 0.0854    | -5.432         | <.0001         |
| 1-queen Lh 24h vs 1-queen Tn 7d    | -0.38377        | 0.0878    | -4.373         | <b>0.0003</b>  |
| 1-queen Lh 24h vs 6-queens Tn 7d   | -0.50608        | 0.0853    | -5.931         | <.0001         |
| 6-queens Lh 24h vs 1-queen Tn 24h  | 0.13347         | 0.0842    | 1.585          | 0.7593         |
| 6-queens Lh 24h vs 6-queens Tn 24h | -0.02752        | 0.0815    | -0.338         | 10.000         |
| 6-queens Lh 24h vs 1-queen Lh 7d   | 0.06138         | 0.0927    | 0.662          | 0.9979         |
| 6-queens Lh 24h vs 6-queens Lh 7d  | -0.03377        | 0.0597    | -0.565         | 0.9992         |
| 6-queens Lh 24h vs 1-queen Tn 7d   | 0.04649         | 0.0839    | 0.554          | 0.9993         |
| 6-queens Lh 24h vs 6-queens Tn 7d  | -0.07581        | 0.0813    | -0.932         | 0.9830         |
| 1-queen Tn 24h vs 6-queens Tn 24h  | -0.16099        | 0.0841    | -1.914         | 0.5412         |
| 1-queen Tn 24h vs 1-queen Lh 7d    | -0.07209        | 0.0951    | -0.758         | 0.9951         |
| 1-queen Tn 24h vs 6-queens Lh 7d   | -0.16724        | 0.0841    | -1.989         | 0.4896         |
| 1-queen Tn 24h vs 1-queen Tn 7d    | -0.08698        | 0.0638    | -1.363         | 0.8740         |
| 1-queen Tn 24h vs 6-queens Tn 7d   | -0.20928        | 0.0840    | -2.492         | 0.1989         |
| 6-queens Tn 24h vs 1-queen Lh 7d   | 0.08890         | 0.0927    | 0.959          | 0.9799         |
| 6-queens Tn 24h vs 6-queens Lh 7d  | -0.00625        | 0.0814    | -0.077         | 10.000         |
| 6-queens Tn 24h vs 1-queen Tn 7d   | 0.07401         | 0.0838    | 0.883          | 0.9876         |
| 6-queens Tn 24h vs 6-queens Tn 7d  | -0.04829        | 0.0595    | -0.812         | 0.9925         |
| 1-queen Lh 7d vs 6-queens Lh 7d    | -0.09515        | 0.0926    | -1.027         | 0.9705         |
| 1-queen Lh 7d vs 1-queen Tn 7d     | -0.01489        | 0.0949    | -0.157         | 10.000         |
| 1-queen Lh 7d vs 6-queens Tn 7d    | -0.13719        | 0.0925    | -1.482         | 0.8172         |
| 6-queens Lh 7d vs 1-queen Tn 7d    | 0.08026         | 0.0838    | 0.958          | 0.9801         |
| 6-queens Lh 7d vs 6-queens Tn 7d   | -0.04204        | 0.0812    | -0.517         | 0.9996         |
| 1-queen Tn 7d vs 6-queens Tn 7d    | -0.12230        | 0.0837    | -1.461         | 0.8283         |

Table SM9. Pairwise comparison for significant interaction between number of Queens, species and time combination from model for established nests.

|                                      |                  | <b>estimate</b> | <b>SE</b> | <b>z-value</b> | <b>p-value</b> |
|--------------------------------------|------------------|-----------------|-----------|----------------|----------------|
| Workers occupied in patrolling       | Queens           | -0.456          | 0.400     | -1.140         | 0.254          |
|                                      | Species          | -0.913          | 0.408     | -2.238         | <b>0.025</b>   |
|                                      | Queens x species | -0.121          | 0.592     | -0.205         | 0.838          |
| Workers occupied in nest maintenance | Queens           | -0.806          | 0.271     | -2.980         | <b>0.003</b>   |
|                                      | Species          | -0.321          | 0.268     | -1.196         | 0.232          |
|                                      | Queens x species | -0.243          | 0.387     | -0.627         | 0.531          |

|                             |                  |        |       |        |              |
|-----------------------------|------------------|--------|-------|--------|--------------|
| Workers occupied in feeding | Queens           | -0.728 | 0.327 | -2.227 | <b>0.026</b> |
|                             | Species          | -0.254 | 0.306 | -0.830 | 0.406        |
|                             | Queens x species | 0.477  | 0.460 | 1.037  | 0.300        |

Table SM10. Generalized linear model (GLM) results for the relationship between workers outside the nest 7 days after placing them in the foraging arena according to the species (Lh= *L. humile* and Tn = *T. nigerrimum*), number of queens (1 or 6), and their interaction as fixed effects. Bold values show p-values < 0.05
